# Supplementary material for: Gut microbiome composition and risk factors in a large cross-sectional IBS cohort
Source: PubMed Central journal article supplement — BMJ Open Gastroenterol. 2020 Apr 6;7(1):e000345. doi: 10.1136/bmjgast-2019-000345 (PMC7254124; doi:10.1136/bmjgast-2019-000345), 2020-04-06

## SUPPLEMENTARY MATERIALS

Figure A1: Genus-level pairwise odds ratios of for IBS vs. control

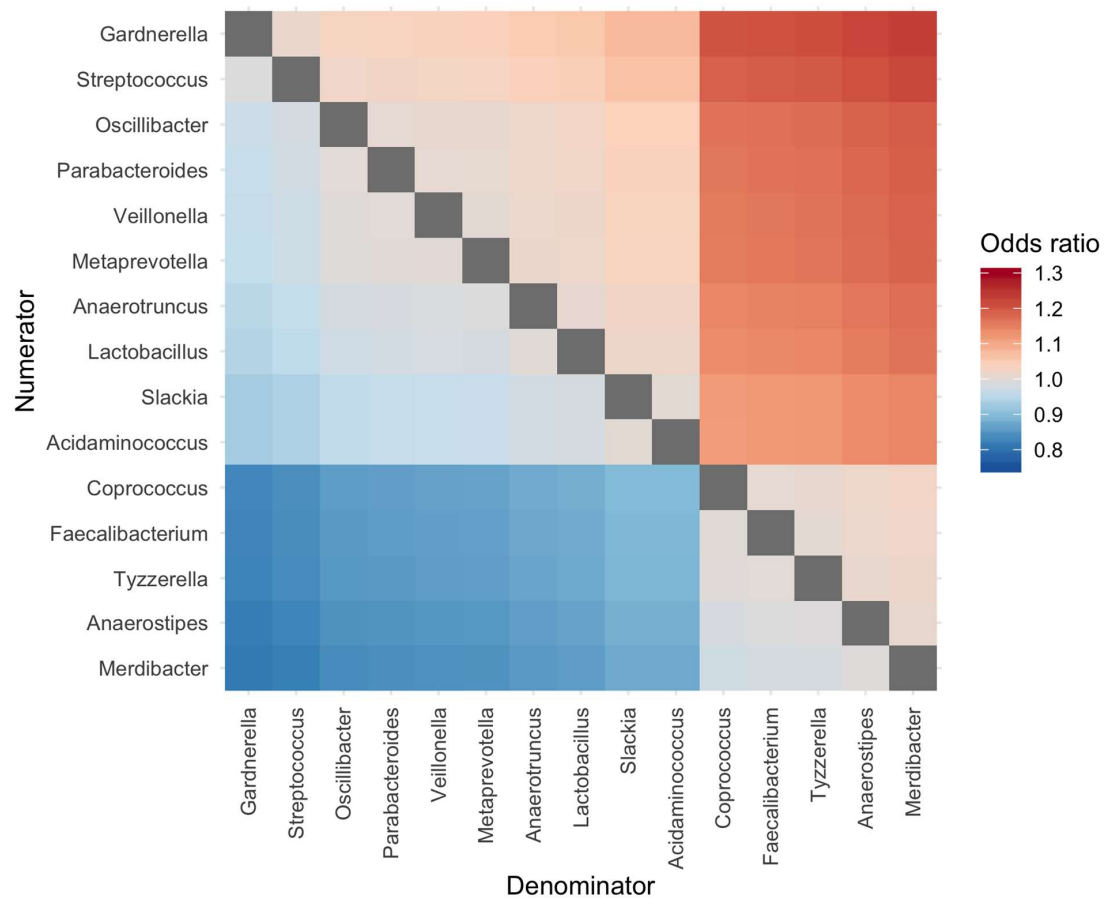

Figure A2: Phylum-level pairwise odds ratios of for IBS vs. control

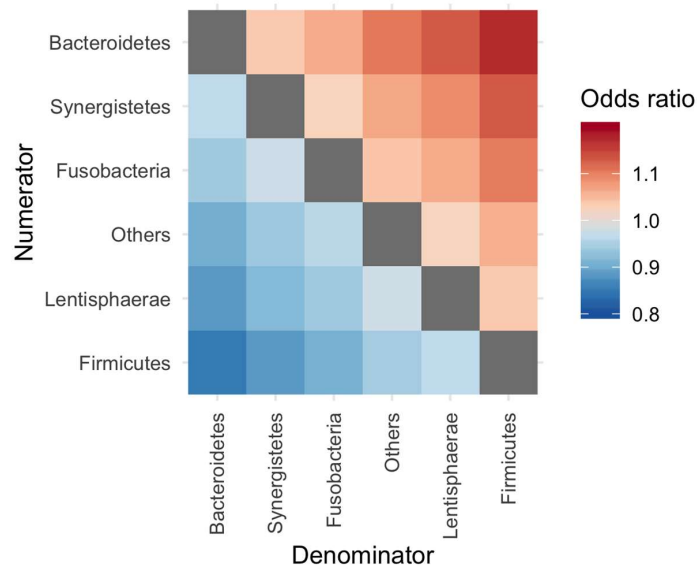

Table A1: Wilcoxon rank-sum tests of all species for control vs. IBS

| Species                                  | W       | Adjusted p-value<br>(q-value) |
|------------------------------------------|---------|-------------------------------|
| <i>Flavonifractor plautii</i>            | 689555  | <0.01                         |
| <i>Faecalibacterium prausnitzii</i>      | 1167612 | <0.01                         |
| <i>Faecalimonas umblicata</i>            | 737862  | <0.01                         |
| <i>Eggerthella lenta</i>                 | 746138  | <0.01                         |
| <i>Erysipelatoclostridium ramosum</i>    | 754745  | <0.01                         |
| <i>Hungatella hathewayi</i>              | 757205  | <0.01                         |
| <i>Ruthenibacterium lactatiformans</i>   | 757359  | <0.01                         |
| <i>Blautia hydrogenotrophica</i>         | 758420  | <0.01                         |
| <i>Coprococcus catus</i>                 | 1140868 | <0.01                         |
| <i>Lactobacillus salivarius</i>          | 764651  | <0.01                         |
| <i>Anaerostipes caccae</i>               | 764956  | <0.01                         |
| <i>Neglecta timonensis</i>               | 765163  | <0.01                         |
| <i>Lactobacillus fermentum</i>           | 768811  | <0.01                         |
| <i>Streptococcus mutans</i>              | 769761  | <0.01                         |
| <i>Agathobaculum desmolans</i>           | 769840  | <0.01                         |
| <i>Lachnoclostridium phocaeense</i>      | 771022  | <0.01                         |
| <i>Anaerotrignum lactatifermentans</i>   | 771722  | <0.01                         |
| <i>Campylobacter ureolyticus</i>         | 772758  | <0.01                         |
| <i>Clostridium perfringens</i>           | 774222  | <0.01                         |
| <i>Collinsella tanakaei</i>              | 775017  | <0.01                         |
| <i>Eubacterium limosum</i>               | 775614  | <0.01                         |
| <i>Lactobacillus reuteri</i>             | 776210  | <0.01                         |
| <i>Megasphaera massiliensis</i>          | 776633  | <0.01                         |
| <i>Peptoniphilus coxii</i>               | 776888  | <0.01                         |
| <i>Anaerotruncus colihominis</i>         | 778600  | <0.01                         |
| <i>Streptococcus pneumoniae</i>          | 778671  | <0.01                         |
| <i>Corynebacterium pyruviciproducens</i> | 780024  | <0.01                         |
| <i>Anaerococcus senegalensis</i>         | 780339  | <0.01                         |
| <i>Streptococcus anginosus</i>           | 780707  | <0.01                         |
| <i>Corynebacterium pseudogenitalium</i>  | 781035  | <0.01                         |
| <i>Emergencia timonensis</i>             | 781650  | <0.01                         |
| <i>Absiella dolichum</i>                 | 782046  | <0.01                         |
| <i>Gardnerella vaginalis</i>             | 782491  | <0.01                         |
| <i>Intestinimonas butyriciproducens</i>  | 783027  | <0.01                         |
| <i>Actinomyces neuii</i>                 | 784006  | <0.01                         |
| <i>Lactobacillus rhamnosus</i>           | 784739  | <0.01                         |
| <i>Butyricoccus pullicaecorum</i>        | 784744  | <0.01                         |
| <i>Gordonibacter urolithinfaciens</i>    | 786220  | <0.01                         |
| <i>Facklamia hominis</i>                 | 786298  | <0.01                         |
| <i>Lagierella massiliensis</i>           | 786818  | <0.01                         |
| <i>Lactobacillus jensenii</i>            | 787688  | <0.01                         |
| <i>Anaerococcus octavius</i>             | 787708  | <0.01                         |
| <i>Lactobacillus iners</i>               | 787925  | <0.01                         |
| <i>Holdemania filiformis</i>             | 787955  | <0.01                         |
| <i>Streptococcus agalactiae</i>          | 788242  | <0.01                         |
| <i>Corynebacterium riegelii</i>          | 788593  | <0.01                         |
| <i>Slackia piriformis</i>                | 788695  | <0.01                         |
| <i>Paraprevotella xylaniphila</i>        | 789025  | <0.01                         |
| <i>Prevotella bergensis</i>              | 789451  | <0.01                         |
| <i>Atopobium vaginae</i>                 | 790527  | <0.01                         |
| <i>Blautia obeum</i>                     | 1111638 | <0.01                         |
| <i>Eisenbergiella tayi</i>               | 791367  | <0.01                         |
| <i>Cloacibacillus evryensis</i>          | 794011  | <0.01                         |
| <i>Fusobacterium nucleatum</i>           | 794076  | <0.01                         |

|                                      |         |       |
|--------------------------------------|---------|-------|
| <i>Dielma fastidiosa</i>             | 794330  | <0.01 |
| <i>Faecalicatena contorta</i>        | 794487  | <0.01 |
| <i>Peptococcus niger</i>             | 794863  | <0.01 |
| <i>Porphyromonas somerae</i>         | 795539  | <0.01 |
| <i>Sneathia amnii</i>                | 795557  | <0.01 |
| <i>Anaerococcus provencensis</i>     | 797210  | <0.01 |
| <i>Negativicoccus massiliensis</i>   | 797265  | <0.01 |
| <i>Megasphaera elsdenii</i>          | 797884  | <0.01 |
| <i>Prevotellamassilia timonensis</i> | 798167  | <0.01 |
| <i>Murdochiella massiliensis</i>     | 798672  | <0.01 |
| <i>Acidaminococcus intestini</i>     | 799358  | <0.01 |
| <i>Coprobacillus cateniformis</i>    | 800413  | <0.01 |
| <i>Parabacteroides faecis</i>        | 800966  | <0.01 |
| <i>Prevotella bivia</i>              | 801257  | <0.01 |
| <i>Faecalitalea cylindroides</i>     | 801472  | <0.01 |
| <i>Dorea longicatena</i>             | 1100287 | <0.01 |
| <i>Staphylococcus aureus</i>         | 803486  | <0.01 |
| <i>Gabonia massiliensis</i>          | 803853  | <0.01 |
| <i>Porphyromonas uenonis</i>         | 804116  | <0.01 |
| <i>Porphyromonas asaccharolytica</i> | 805347  | <0.01 |
| <i>Alistipes indistinctus</i>        | 806071  | <0.01 |
| <i>Victivallis vadensis</i>          | 806235  | <0.01 |
| <i>Lactobacillus ruminis</i>         | 806292  | <0.01 |
| <i>Peptoniphilus lacrimalis</i>      | 806893  | <0.01 |
| <i>Odoribacter laneus</i>            | 807315  | <0.01 |
| <i>Dialister succinatiphilus</i>     | 807967  | <0.01 |
| <i>Tyzzerella nexilis</i>            | 808241  | <0.01 |
| <i>Allisonella histaminiformans</i>  | 809395  | <0.01 |
| <i>Dakarella massiliensis</i>        | 810101  | <0.01 |
| <i>Bacteroides coprophilus</i>       | 810548  | <0.01 |
| <i>Collinsella bouchedurhonensis</i> | 810711  | <0.01 |
| <i>Ileibacterium massiliense</i>     | 810763  | <0.01 |
| <i>Bacteroides xylanisolvens</i>     | 810765  | <0.01 |
| <i>Bacteroides ovatus</i>            | 811506  | <0.01 |
| <i>Bifidobacterium bifidum</i>       | 811750  | <0.01 |
| <i>Peptoniphilus duerdenii</i>       | 812220  | <0.01 |
| <i>Blautia schinkii</i>              | 1090133 | <0.01 |
| <i>Mobiluncus curtisii</i>           | 812422  | <0.01 |
| <i>Prevotella timonensis</i>         | 813321  | <0.01 |
| <i>Gemmiger formicilis</i>           | 1087059 | <0.01 |
| <i>Mitsuokella jalaludinii</i>       | 816135  | <0.01 |
| <i>Dialister propionificiens</i>     | 817243  | <0.01 |
| <i>Bacteroides clarus</i>            | 817446  | <0.01 |
| <i>Mitsuokella multacida</i>         | 817493  | <0.01 |
| <i>Coprococcus comes</i>             | 1084334 | <0.01 |
| <i>Oxalobacter formigenes</i>        | 818498  | <0.01 |
| <i>Peptostreptococcus anaerobius</i> | 818609  | <0.01 |
| <i>Bacteroides eggertii</i>          | 819412  | <0.01 |
| <i>Parabacteroides johnsonii</i>     | 820089  | <0.01 |
| <i>Methanosphaera stadtmanae</i>     | 820898  | <0.01 |
| <i>Bacteroides nordii</i>            | 821663  | <0.01 |
| <i>Duodenibacillus massiliensis</i>  | 821736  | <0.01 |
| <i>Anaerostipes hadrus</i>           | 1080201 | <0.01 |
| <i>Dialister invisus</i>             | 822939  | <0.01 |
| <i>Lactococcus lactis</i>            | 823118  | <0.01 |
| <i>Alistipes ihumii</i>              | 823493  | <0.01 |
| <i>Parabacteroides goldsteinii</i>   | 825222  | <0.01 |
| <i>Blautia massiliensis</i>          | 1075875 | <0.01 |
| <i>Bacteroides coprocola</i>         | 827440  | <0.01 |
| <i>Bacteroides intestinalis</i>      | 828825  | <0.01 |

|                                            |         |       |
|--------------------------------------------|---------|-------|
| <i>Campylobacter hominis</i>               | 829583  | <0.01 |
| <i>Corynebacterium jeikeium</i>            | 830068  | <0.01 |
| <i>Barnesiella intestinihominis</i>        | 830391  | <0.01 |
| <i>Prevotella disiens</i>                  | 831028  | <0.01 |
| <i>Turicibacter sanguinis</i>              | 832247  | <0.01 |
| <i>Casaltella massiliensis</i>             | 834540  | <0.01 |
| <i>Peptoniphilus urinimassiliensis</i>     | 835250  | <0.01 |
| <i>Holdemanella biformis</i>               | 840439  | <0.01 |
| <i>Prevotella buccalis</i>                 | 841886  | <0.01 |
| <i>Bacteroides salyersiae</i>              | 847065  | <0.01 |
| <i>Slackia isoflavoniconvertens</i>        | 847858  | <0.01 |
| <i>Akkermansia muciniphila</i>             | 1054285 | <0.01 |
| <i>Prevotella copri</i>                    | 1053364 | <0.01 |
| <i>Catenibacterium mitsuokai</i>           | 851442  | <0.01 |
| <i>Bacteroides massiliensis</i>            | 1048729 | <0.01 |
| <i>Collinsella aerofaciens</i>             | 1048456 | <0.01 |
| <i>Butyrivibrio fibrosolvens</i>           | 855382  | <0.01 |
| <i>Butyrivibrio crossotus</i>              | 856192  | <0.01 |
| <i>Phascolarctobacterium succinatutens</i> | 857057  | <0.01 |
| <i>Negativibacillus massiliensis</i>       | 858049  | <0.01 |
| <i>Anaerococcus vaginalis</i>              | 858098  | <0.01 |
| <i>Alistipes timonensis</i>                | 859728  | <0.01 |
| <i>Prevotella corporis</i>                 | 863307  | <0.01 |
| <i>Coprobacter fastidiosus</i>             | 863677  | <0.01 |
| <i>Alistipes shahii</i>                    | 1033851 | <0.01 |
| <i>Bacteroides finegoldii</i>              | 868794  | <0.01 |
| <i>Sutterella wadsworthensis</i>           | 1028995 | <0.01 |
| <i>Ruminococcus callidus</i>               | 876595  | <0.01 |
| <i>Desulfovibrio piger</i>                 | 877791  | <0.01 |
| <i>Alistipes finegoldii</i>                | 879087  | <0.01 |
| <i>Ruminococcus bromii</i>                 | 1023135 | <0.01 |
| <i>Dorea formicigenerans</i>               | 1018650 | <0.01 |
| <i>Odoribacter splanchnicus</i>            | 1016082 | <0.01 |
| <i>Corynebacterium singulare</i>           | 890365  | <0.01 |
| <i>Parasutterella excrementihominis</i>    | 1005275 | 0.01  |
| <i>Others</i>                              | 897286  | 0.01  |
| <i>Roseburia hominis</i>                   | 898403  | 0.01  |
| <i>Bilophila wadsworthia</i>               | 900481  | 0.02  |
| <i>Intestinibacter bartlettii</i>          | 900722  | 0.02  |
| <i>Ruminococcus lactaris</i>               | 999935  | 0.02  |
| <i>Bacteroides fragilis</i>                | 906821  | 0.04  |
| <i>Bacteroides caccae</i>                  | 989559  | 0.08  |
| <i>Parabacteroides merdae</i>              | 915586  | 0.1   |
| <i>Methanobrevibacter smithii</i>          | 916965  | 0.12  |
| <i>Roseburia inulinivorans</i>             | 982354  | 0.15  |
| <i>Coprococcus eutactus</i>                | 980108  | 0.19  |
| <i>Bacteroides plebeius</i>                | 980007  | 0.19  |
| <i>Parabacteroides distasonis</i>          | 925598  | 0.24  |
| <i>Phascolarctobacterium faecium</i>       | 926380  | 0.26  |
| <i>Senegalimassilia anaerobia</i>          | 926938  | 0.26  |
| <i>Bifidobacterium adolescentis</i>        | 974988  | 0.27  |
| <i>Roseburia intestinalis</i>              | 974494  | 0.28  |
| <i>Bacteroides vulgatus</i>                | 928398  | 0.29  |
| <i>Finegoldia magna</i>                    | 932446  | 0.39  |
| <i>Eubacterium ramulus</i>                 | 969166  | 0.4   |
| <i>Alistipes obesi</i>                     | 967614  | 0.44  |
| <i>Bacteroides uniformis</i>               | 960274  | 0.68  |
| <i>Roseburia faecis</i>                    | 945495  | 0.79  |
| <i>Blautia stercoris</i>                   | 955009  | 0.86  |

Table A2: Logistic regression for control vs. IBS at species level (Full model)

| Variable                                 | OR   | 95% CI    | p-value |
|------------------------------------------|------|-----------|---------|
| <i>Dorea formicigenerans</i>             | 1.09 | 1.03-1.15 | <0.01   |
| <i>Flavonifractor plautii</i>            | 1.10 | 1.04-1.17 | <0.01   |
| <i>Tyzzerella nexilis</i>                | 0.90 | 0.84-0.96 | <0.01   |
| <i>Anaerococcus provencensis</i>         | 1.14 | 1.03-1.27 | 0.01    |
| <i>Blautia hydrogenotrophica</i>         | 1.10 | 1.03-1.17 | 0.01    |
| <i>Faecalimonas umbilicata</i>           | 1.09 | 1.02-1.17 | 0.01    |
| <i>Gardnerella vaginalis</i>             | 1.16 | 1.04-1.28 | 0.01    |
| <i>Lactobacillus jensenii</i>            | 1.18 | 1.04-1.34 | 0.01    |
| <i>Prevotella copri</i>                  | 1.06 | 1.01-1.10 | 0.01    |
| <i>Staphylococcus aureus</i>             | 0.89 | 0.80-0.98 | 0.01    |
| <i>Corynebacterium pyruviciproducens</i> | 1.12 | 1.02-1.22 | 0.02    |
| <i>Lactobacillus salivarius</i>          | 1.24 | 1.04-1.48 | 0.02    |
| <i>Streptococcus agalactiae</i>          | 1.15 | 1.02-1.30 | 0.02    |
| <i>Anaerostipes hadrus</i>               | 0.92 | 0.85-0.99 | 0.03    |
| <i>Bacteroides finegoldii</i>            | 1.06 | 1.01-1.11 | 0.03    |
| <i>Bilophila wadsworthia</i>             | 1.05 | 1.01-1.11 | 0.03    |
| <i>Acidaminococcus intestini</i>         | 1.06 | 1.00-1.13 | 0.04    |
| <i>Clostridium perfringens</i>           | 1.16 | 1.00-1.35 | 0.05    |
| <i>Slackia piriformis</i>                | 1.07 | 1.00-1.14 | 0.05    |
| <i>Blautia massiliensis</i>              | 0.94 | 0.87-1.00 | 0.06    |
| <i>Lactobacillus fermentum</i>           | 1.22 | 0.99-1.49 | 0.06    |
| Species <i>Murdochella massiliensis</i>  | 1.11 | 1.00-1.24 | 0.06    |
| <i>Coprococcus catus</i>                 | 0.95 | 0.91-1.00 | 0.07    |
| <i>Negativicoccus massiliensis</i>       | 0.89 | 0.79-1.01 | 0.07    |
| <i>Slackia isoflavoniconvertens</i>      | 1.06 | 0.99-1.13 | 0.07    |
| <i>Bacteroides coprocola</i>             | 1.06 | 0.99-1.13 | 0.09    |
| <i>Bacteroides massiliensis</i>          | 1.04 | 0.99-1.08 | 0.09    |
| <i>Megasphaera massiliensis</i>          | 1.06 | 0.99-1.14 | 0.09    |
| <i>Streptococcus pneumoniae</i>          | 1.07 | 0.99-1.16 | 0.09    |
| <i>Alistipes indistinctus</i>            | 1.05 | 0.99-1.12 | 0.10    |
| <i>Anaerococcus vaginalis</i>            | 0.94 | 0.87-1.01 | 0.10    |
| <i>Bacteroides fragilis</i>              | 1.04 | 0.99-1.09 | 0.10    |
| <i>Alistipes finegoldii</i>              | 1.04 | 0.99-1.09 | 0.12    |
| <i>Bacteroides eggerthii</i>             | 1.05 | 0.99-1.11 | 0.12    |
| <i>Coprobacillus cateniformis</i>        | 0.93 | 0.84-1.02 | 0.12    |
| <i>Lachnoclostridium phocaeense</i>      | 1.10 | 0.98-1.24 | 0.12    |
| <i>Prevotella timonensis</i>             | 0.93 | 0.84-1.02 | 0.12    |
| <i>Streptococcus mutans</i>              | 1.11 | 0.97-1.28 | 0.13    |
| <i>Neglecta timonensis</i>               | 1.06 | 0.98-1.13 | 0.14    |
| <i>Dialister invisus</i>                 | 1.03 | 0.99-1.08 | 0.15    |
| <i>Coprococcus comes</i>                 | 1.04 | 0.98-1.09 | 0.17    |
| <i>Corynebacterium jeikeium</i>          | 0.93 | 0.85-1.03 | 0.17    |
| <i>Peptoniphilus urinimassiliensis</i>   | 1.07 | 0.97-1.17 | 0.17    |
| <i>Sutterella wadsworthensis</i>         | 0.96 | 0.92-1.02 | 0.17    |

|                                            |      |           |      |
|--------------------------------------------|------|-----------|------|
| <i>Faecalibacterium prausnitzii</i>        | 0.96 | 0.91-1.02 | 0.18 |
| <i>Paraprevotella xylaniphila</i>          | 1.08 | 0.97-1.21 | 0.18 |
| <i>Coprobacter fastidiosus</i>             | 0.96 | 0.91-1.02 | 0.19 |
| <i>Parasutterella excrementihominis</i>    | 0.97 | 0.93-1.02 | 0.19 |
| <i>Bacteroides nordii</i>                  | 1.04 | 0.98-1.09 | 0.20 |
| <i>Desulfovibrio piger</i>                 | 0.96 | 0.91-1.02 | 0.20 |
| <i>Blautia obeum</i>                       | 1.04 | 0.98-1.11 | 0.21 |
| <i>Collinsella aerofaciens</i>             | 1.03 | 0.98-1.08 | 0.21 |
| <i>Anaerococcus octavius</i>               | 1.06 | 0.96-1.18 | 0.22 |
| <i>Atopobium vaginae</i>                   | 0.92 | 0.80-1.05 | 0.22 |
| <i>Eubacterium limosum</i>                 | 0.95 | 0.87-1.03 | 0.22 |
| <i>Gemmiger formicilis</i>                 | 1.03 | 0.98-1.09 | 0.22 |
| <i>Alistipes shahii</i>                    | 0.97 | 0.92-1.02 | 0.23 |
| <i>Methanosphaera stadtmanae</i>           | 0.94 | 0.85-1.04 | 0.23 |
| <i>Allisonella histaminiformans</i>        | 0.96 | 0.89-1.03 | 0.25 |
| <i>Collinsella tanakaei</i>                | 1.05 | 0.97-1.14 | 0.25 |
| <i>Streptococcus anginosus</i>             | 1.05 | 0.97-1.14 | 0.25 |
| <i>Lactococcus lactis</i>                  | 0.96 | 0.90-1.03 | 0.26 |
| <i>Peptoniphilus coxii</i>                 | 1.06 | 0.96-1.18 | 0.26 |
| <i>Corynebacterium singulare</i>           | 0.96 | 0.89-1.03 | 0.27 |
| <i>Absiella dolichum</i>                   | 1.06 | 0.96-1.17 | 0.28 |
| <i>Eisenbergiella tayi</i>                 | 0.95 | 0.88-1.04 | 0.28 |
| <i>Peptococcus niger</i>                   | 1.06 | 0.95-1.19 | 0.29 |
| <i>Phascolarctobacterium succinatutens</i> | 1.03 | 0.97-1.10 | 0.29 |
| <i>Mobiluncus curtisii</i>                 | 0.94 | 0.84-1.05 | 0.30 |
| <i>Bacteroides ovatus</i>                  | 1.03 | 0.97-1.08 | 0.32 |
| <i>Catenibacterium mitsuokai</i>           | 0.97 | 0.90-1.03 | 0.32 |
| <i>Parabacteroides goldsteinii</i>         | 1.03 | 0.97-1.09 | 0.32 |
| <i>Ruminococcus callidus</i>               | 1.03 | 0.98-1.08 | 0.32 |
| <i>Bacteroides coprophilus</i>             | 0.95 | 0.86-1.05 | 0.33 |
| <i>Porphyromonas uenonis</i>               | 0.95 | 0.85-1.06 | 0.33 |
| <i>Holdemanella biformis</i>               | 1.03 | 0.97-1.11 | 0.34 |
| <i>Roseburia hominis</i>                   | 0.98 | 0.94-1.02 | 0.34 |
| <i>Bacteroides intestinalis</i>            | 1.03 | 0.97-1.09 | 0.36 |
| <i>Faecalicatena contorta</i>              | 1.05 | 0.95-1.15 | 0.36 |
| <i>Turicibacter sanguinis</i>              | 0.97 | 0.91-1.03 | 0.36 |
| <i>Campylobacter ureolyticus</i>           | 1.05 | 0.95-1.16 | 0.37 |
| <i>Erysipelatoclostridium ramosum</i>      | 1.03 | 0.97-1.09 | 0.37 |
| <i>Lactobacillus iners</i>                 | 1.04 | 0.96-1.12 | 0.37 |
| <i>Ruthenibacterium lactatiformans</i>     | 1.04 | 0.96-1.12 | 0.37 |
| <i>Bacteroides salyersiae</i>              | 1.02 | 0.97-1.08 | 0.39 |
| <i>Duodenibacillus massiliensis</i>        | 0.96 | 0.88-1.05 | 0.39 |
| <i>Mitsuokella multacida</i>               | 0.95 | 0.85-1.07 | 0.41 |
| <i>Anaerococcus senegalensis</i>           | 1.04 | 0.94-1.15 | 0.43 |
| <i>Alistipes timonensis</i>                | 0.98 | 0.92-1.04 | 0.44 |
| <i>Porphyromonas somerae</i>               | 1.04 | 0.94-1.16 | 0.45 |
| <i>Eggerthella lenta</i>                   | 1.02 | 0.97-1.08 | 0.46 |
| <i>Odoribacter splanchnicus</i>            | 1.02 | 0.96-1.08 | 0.50 |
| <i>Prevotella disiens</i>                  | 0.97 | 0.90-1.05 | 0.50 |

|                                         |      |           |      |
|-----------------------------------------|------|-----------|------|
| <i>Cloacibacillus evryensis</i>         | 1.03 | 0.94-1.13 | 0.51 |
| <i>Intestinibacter bartlettii</i>       | 1.02 | 0.97-1.07 | 0.51 |
| <i>Alistipes ihumii</i>                 | 1.02 | 0.96-1.08 | 0.54 |
| <i>Dorea longicatena</i>                | 0.98 | 0.92-1.05 | 0.55 |
| <i>Lactobacillus rhamnosus</i>          | 1.04 | 0.91-1.20 | 0.55 |
| <i>Corynebacterium riegeli</i>          | 1.03 | 0.91-1.17 | 0.59 |
| <i>Hungatella hathewayi</i>             | 1.02 | 0.94-1.11 | 0.59 |
| <i>Peptostreptococcus anaerobius</i>    | 0.98 | 0.89-1.07 | 0.59 |
| <i>Blautia schinkii</i>                 | 0.99 | 0.93-1.04 | 0.61 |
| <i>Dakarella massiliensis</i>           | 1.02 | 0.95-1.09 | 0.61 |
| <i>Lactobacillus reuteri</i>            | 0.96 | 0.82-1.13 | 0.61 |
| <i>Prevotellamassilia timonensis</i>    | 0.97 | 0.88-1.08 | 0.61 |
| <i>Others</i>                           | 1.01 | 0.96-1.07 | 0.61 |
| <i>Dialister succinatiphilus</i>        | 0.98 | 0.88-1.08 | 0.63 |
| <i>Bacteroides clarus</i>               | 0.98 | 0.91-1.06 | 0.64 |
| <i>Emergencia timonensis</i>            | 0.98 | 0.90-1.07 | 0.64 |
| <i>Ruminococcus bromii</i>              | 0.99 | 0.95-1.03 | 0.64 |
| <i>Mitsuokella jalaludinii</i>          | 1.03 | 0.91-1.17 | 0.65 |
| <i>Campylobacter hominis</i>            | 0.98 | 0.89-1.07 | 0.67 |
| <i>Ileibacterium massiliense</i>        | 1.03 | 0.91-1.16 | 0.67 |
| <i>Porphyromonas asaccharolytica</i>    | 1.02 | 0.93-1.12 | 0.67 |
| <i>Intestinimonas butyriciproducens</i> | 1.02 | 0.94-1.10 | 0.68 |
| <i>Odoribacter laneus</i>               | 1.02 | 0.94-1.10 | 0.69 |
| <i>Butyricimonas virosa</i>             | 1.01 | 0.96-1.07 | 0.70 |
| <i>Fusobacterium nucleatum</i>          | 0.98 | 0.87-1.10 | 0.71 |
| <i>Dielma fastidiosa</i>                | 0.98 | 0.89-1.09 | 0.73 |
| <i>Oxalobacter formigenes</i>           | 1.01 | 0.94-1.09 | 0.73 |
| <i>Akkermansia muciniphila</i>          | 0.99 | 0.95-1.03 | 0.74 |
| <i>Lactobacillus ruminis</i>            | 1.02 | 0.93-1.12 | 0.74 |
| <i>Parabacteroides faecis</i>           | 0.98 | 0.89-1.09 | 0.74 |
| <i>Bifidobacterium bifidum</i>          | 1.01 | 0.95-1.07 | 0.75 |
| <i>Collinsella bouchesdurhonensis</i>   | 1.02 | 0.93-1.11 | 0.75 |
| <i>Bacteroides xylanisolvens</i>        | 1.01 | 0.92-1.11 | 0.77 |
| <i>Prevotella bergensis</i>             | 1.02 | 0.90-1.16 | 0.77 |
| <i>Parabacteroides johnsonii</i>        | 1.01 | 0.95-1.07 | 0.78 |
| <i>Peptoniphilus duerdenii</i>          | 0.99 | 0.89-1.09 | 0.78 |
| <i>Gabonia massiliensis</i>             | 1.01 | 0.93-1.10 | 0.79 |
| <i>Victivallis vadensis</i>             | 1.01 | 0.92-1.12 | 0.80 |
| <i>Anaerotignum lactatifermentans</i>   | 1.01 | 0.96-1.06 | 0.82 |
| <i>Lagierella massiliensis</i>          | 1.01 | 0.90-1.14 | 0.83 |
| <i>Peptoniphilus lacrimalis</i>         | 1.01 | 0.91-1.13 | 0.83 |
| <i>Barnesiella intestinihominis</i>     | 1.01 | 0.95-1.07 | 0.85 |
| <i>Butyricoccus pullicaecorum</i>       | 1.01 | 0.92-1.11 | 0.85 |
| <i>Facklamia hominis</i>                | 1.01 | 0.89-1.15 | 0.86 |
| <i>Gordonibacter urolithinfaciens</i>   | 1.01 | 0.91-1.13 | 0.86 |
| <i>Sneathia amnii</i>                   | 1.01 | 0.89-1.15 | 0.86 |
| <i>Butyrivibrio crossotus</i>           | 1.01 | 0.94-1.08 | 0.89 |
| <i>Holdemania filiformis</i>            | 0.99 | 0.93-1.07 | 0.89 |
| <i>Corynebacterium pseudogenitalium</i> | 1.01 | 0.92-1.09 | 0.90 |



|                                  |                                       |          |            |       |
|----------------------------------|---------------------------------------|----------|------------|-------|
|                                  | <i>Faecalitalea cylindroides</i>      | 0.99     | 0.91-1.08  | 0.90  |
|                                  | <i>Negativibacillus massiliensis</i>  | 1.00     | 0.95-1.05  | 0.90  |
|                                  | <i>Prevotella corporis</i>            | 1.00     | 0.94-1.08  | 0.90  |
|                                  | <i>Ruminococcus lactaris</i>          | 1.00     | 0.95-1.04  | 0.91  |
|                                  | <i>Actinomyces neuii</i>              | 1.01     | 0.90-1.13  | 0.92  |
|                                  | <i>Anaerostipes caccae</i>            | 1.00     | 0.91-1.10  | 0.92  |
|                                  | <i>Anaerotruncus colihominis</i>      | 1.00     | 0.91-1.09  | 0.92  |
|                                  | <i>Agathobaculum desmolans</i>        | 1.00     | 0.93-1.07  | 0.93  |
|                                  | <i>Dialister propionicifaciens</i>    | 1.00     | 0.90-1.12  | 0.96  |
|                                  | <i>Megasphaera elsdenii</i>           | 1.00     | 0.91-1.11  | 0.96  |
|                                  | <i>Prevotella buccalis</i>            | 1.00     | 0.92-1.08  | 0.97  |
|                                  | <i>Prevotella bivia</i>               | 1.00     | 0.92-1.08  | 0.98  |
|                                  | <i>Casaltella massiliensis</i>        | 1.00     | 0.89-1.12  | 1.00  |
| Sex                              | Male                                  | 1.00     | 0.68-1.48  | 1.00  |
|                                  | Female                                | Referent | -          | -     |
| Age (years)                      | >34 to 42                             | 0.99     | 0.73-1.34  | 0.95  |
|                                  | >42 to 52                             | 0.97     | 0.71-1.32  | 0.84  |
|                                  | >52 to 81                             | 1.17     | 0.85-1.61  | 0.34  |
|                                  | 18 to 34                              | Referent | -          | -     |
| Age-sex interaction              | Male:Age(>34 to 42)                   | 0.78     | 0.46-1.32  | 0.36  |
|                                  | Male:Age(>42 to 52)                   | 0.64     | 0.36-1.11  | 0.11  |
|                                  | Male:Age(>52 to 81)                   | 0.70     | 0.39-1.24  | 0.22  |
| Race                             | African American                      | 1.10     | 0.47-2.60  | 0.82  |
|                                  | Asian/Oceania/Pacific Islander/Hawaii | 0.54     | 0.32-0.91  | 0.02  |
|                                  | Latin American/Hispanic               | 0.52     | 0.29-0.91  | 0.02  |
|                                  | Mixed                                 | 0.41     | 0.23-0.73  | <0.01 |
|                                  | Unknown                               | 0.85     | 0.69-1.03  | 0.10  |
|                                  | Caucasian/European/American           | Referent | -          | -     |
| Antibiotic use in preceding year | Penicillins                           | 1.32     | 1.03-1.68  | 0.03  |
|                                  | Tetracyclines                         | 1.82     | 1.21-2.74  | <0.01 |
|                                  | Cephalosporins                        | 1.85     | 1.07-3.19  | 0.03  |
|                                  | Quinolones                            | 1.94     | 1.27-2.96  | <0.01 |
|                                  | Lincomycins                           | 2.01     | 0.86-4.70  | 0.11  |
|                                  | Macrolides                            | 1.42     | 1.00-2.03  | 0.05  |
|                                  | Sulfonamides                          | 2.06     | 0.99-4.28  | 0.05  |
|                                  | Glycopeptides                         | 4.54     | 0.47-43.82 | 0.19  |
|                                  | Aminoglycosides                       | 1.33     | 0.19-9.02  | 0.77  |
| Family history of gut disorders  | Irritable bowel syndrome              | 5.46     | 3.97-7.50  | <0.01 |
|                                  | Ulcerative colitis                    | 1.01     | 0.56-1.83  | 0.97  |
|                                  | Crohn's disease                       | 0.95     | 0.54-1.70  | 0.87  |
|                                  | Diverticulitis                        | 1.38     | 0.99-1.92  | 0.06  |

Table A3: Wilcoxon rank-sum tests of all genera for control vs. IBS  
(Full model)

| Genera                        | W       | Adjusted p-value<br>(q-value) |
|-------------------------------|---------|-------------------------------|
| <i>Coprococcus</i>            | 1179627 | <0.01                         |
| <i>Faecalibacterium</i>       | 1163613 | <0.01                         |
| <i>Eggerthella</i>            | 770212  | <0.01                         |
| <i>Erysipelatoclostridium</i> | 791029  | <0.01                         |
| <i>Anaerotruncus</i>          | 801546  | <0.01                         |
| <i>Anaerotignum</i>           | 803232  | <0.01                         |
| <i>Ruminococcus</i>           | 1097436 | <0.01                         |
| <i>Lactobacillus</i>          | 807118  | <0.01                         |
| <i>Dorea</i>                  | 1091291 | <0.01                         |
| <i>Streptococcus</i>          | 814404  | <0.01                         |
| <i>Acidaminococcus</i>        | 818999  | <0.01                         |
| <i>Veillonella</i>            | 819511  | <0.01                         |
| <i>Megasphaera</i>            | 825183  | <0.01                         |
| <i>Parabacteroides</i>        | 833676  | <0.01                         |
| <i>Holdemania</i>             | 834106  | <0.01                         |
| <i>Intestinimonas</i>         | 834662  | <0.01                         |
| <i>Absiella</i>               | 835493  | <0.01                         |
| <i>Oscillibacter</i>          | 835722  | <0.01                         |
| <i>Ezakiella</i>              | 837373  | <0.01                         |
| <i>Negativicoccus</i>         | 838035  | <0.01                         |
| <i>Gardnerella</i>            | 839454  | <0.01                         |
| <i>Lactonifactor</i>          | 839648  | <0.01                         |
| <i>Enterococcus</i>           | 840819  | <0.01                         |
| <i>Fusobacterium</i>          | 840974  | <0.01                         |
| <i>Pediococcus</i>            | 842982  | <0.01                         |
| <i>Anaerostipes</i>           | 1060480 | <0.01                         |
| <i>Delftia</i>                | 843055  | <0.01                         |
| <i>Dysgonomonas</i>           | 843234  | <0.01                         |
| <i>Fournierella</i>           | 843775  | <0.01                         |
| <i>Escherichia</i>            | 844066  | <0.01                         |
| <i>Weissella</i>              | 844235  | <0.01                         |
| <i>Bacillus</i>               | 844983  | <0.01                         |
| <i>Enterobacter</i>           | 845500  | <0.01                         |
| <i>Facklamia</i>              | 845530  | <0.01                         |
| <i>Faecalicatena</i>          | 846124  | <0.01                         |
| <i>Metaprevotella</i>         | 846635  | <0.01                         |
| <i>Actinomyces</i>            | 847186  | <0.01                         |
| <i>Methanomassiliicoccus</i>  | 847248  | <0.01                         |
| <i>Tyzzeraella</i>            | 847502  | <0.01                         |
| <i>Roseburia</i>              | 1055655 | <0.01                         |
| <i>Gemella</i>                | 848338  | <0.01                         |
| <i>Solobacterium</i>          | 849380  | <0.01                         |
| <i>Lachnobacterium</i>        | 850470  | <0.01                         |
| <i>Peptococcus</i>            | 851064  | <0.01                         |
| <i>Faecalicoccus</i>          | 851333  | <0.01                         |
| <i>Gordonibacter</i>          | 851473  | <0.01                         |

|                           |         |       |
|---------------------------|---------|-------|
| <i>Congobacterium</i>     | 851663  | <0.01 |
| <i>Atopobium</i>          | 852412  | <0.01 |
| <i>Others</i>             | 852829  | <0.01 |
| <i>Sneathia</i>           | 853370  | <0.01 |
| <i>Brachyspira</i>        | 854096  | <0.01 |
| <i>Alistipes</i>          | 1049295 | <0.01 |
| <i>Faecalitalea</i>       | 854853  | <0.01 |
| <i>Staphylococcus</i>     | 856466  | <0.01 |
| <i>Leuconostoc</i>        | 857384  | <0.01 |
| <i>Allisonella</i>        | 858648  | <0.01 |
| <i>Bacteroides</i>        | 858719  | <0.01 |
| <i>Olsenella</i>          | 859298  | <0.01 |
| <i>Megamonas</i>          | 859931  | <0.01 |
| <i>Subdoligranulum</i>    | 860231  | <0.01 |
| <i>Varibaculum</i>        | 860304  | <0.01 |
| <i>Libanicoccus</i>       | 860577  | <0.01 |
| <i>Brevibacterium</i>     | 861083  | <0.01 |
| <i>Dakarella</i>          | 861932  | <0.01 |
| <i>Gabonibacter</i>       | 862713  | <0.01 |
| <i>Campylobacter</i>      | 866059  | <0.01 |
| <i>Mobiluncus</i>         | 871161  | <0.01 |
| <i>Peptostreptococcus</i> | 871745  | <0.01 |
| <i>Dialister</i>          | 871946  | <0.01 |
| <i>Oxalobacter</i>        | 873138  | <0.01 |
| <i>Merdivacter</i>        | 875844  | <0.01 |
| <i>Mitsuokella</i>        | 876718  | <0.01 |
| <i>Lactococcus</i>        | 878407  | <0.01 |
| <i>Methanosphaera</i>     | 879070  | <0.01 |
| <i>Porphyromonas</i>      | 879190  | <0.01 |
| <i>Slackia</i>            | 881984  | <0.01 |
| <i>Barnesiella</i>        | 883193  | <0.01 |
| <i>Prevotella</i>         | 1020284 | <0.01 |
| <i>Howardella</i>         | 884120  | <0.01 |
| <i>Peptoniphilus</i>      | 885929  | <0.01 |
| <i>Casaltella</i>         | 888989  | <0.01 |
| <i>Holdemanella</i>       | 890229  | <0.01 |
| <i>Odoribacter</i>        | 1012078 | 0.01  |
| <i>Blautia</i>            | 894512  | 0.01  |
| <i>Catenibacterium</i>    | 896945  | 0.01  |
| <i>Sutterella</i>         | 1006440 | 0.01  |
| <i>Anaerococcus</i>       | 898817  | 0.01  |
| <i>Massilibrevotella</i>  | 899259  | 0.02  |
| <i>Collinsella</i>        | 999236  | 0.03  |
| <i>Haemophilus</i>        | 909314  | 0.05  |
| <i>Butyrivibrio</i>       | 910588  | 0.06  |
| <i>Butyricimonas</i>      | 910757  | 0.06  |
| <i>Bilophila</i>          | 911466  | 0.06  |
| <i>Bifidobacterium</i>    | 991807  | 0.06  |
| <i>Parasutterella</i>     | 990540  | 0.07  |
| <i>Clostridium</i>        | 913916  | 0.08  |
| <i>Eubacterium</i>        | 989367  | 0.08  |
| <i>Desulfovibrio</i>      | 915748  | 0.09  |
| <i>Akkermansia</i>        | 985090  | 0.12  |
| <i>Finegoldia</i>         | 933834  | 0.42  |

|                              |        |      |
|------------------------------|--------|------|
| <i>Ruminiclostridium</i>     | 936081 | 0.48 |
| <i>Phascolarctobacterium</i> | 966393 | 0.5  |
| <i>Corynebacterium</i>       | 961897 | 0.64 |
| <i>Methanobrevibacter</i>    | 961447 | 0.65 |
| <i>Turicibacter</i>          | 942853 | 0.67 |

Table A4: Logistic regression for control vs. IBS at genus level (Full model)

| Variable                      | OR   | 95% CI    | p-value |
|-------------------------------|------|-----------|---------|
| <i>Faecalibacterium</i>       | 0.94 | 0.90-0.98 | 0.01    |
| <i>Gardnerella</i>            | 1.13 | 1.03-1.23 | 0.01    |
| <i>Lactobacillus</i>          | 1.07 | 1.02-1.13 | 0.01    |
| <i>Veillonella</i>            | 1.09 | 1.02-1.16 | 0.01    |
| <i>Anaerotruncus</i>          | 1.08 | 1.01-1.15 | 0.02    |
| <i>Tyzzerella</i>             | 0.94 | 0.88-0.99 | 0.02    |
| <i>Coprococcus</i>            | 0.94 | 0.89-0.99 | 0.03    |
| <i>Merdibacter</i>            | 0.92 | 0.85-0.99 | 0.03    |
| <i>Metaprevotella</i>         | 1.09 | 1.01-1.17 | 0.03    |
| <i>Slackia</i>                | 1.05 | 1.01-1.10 | 0.03    |
| <i>Acidaminococcus</i>        | 1.05 | 1.00-1.11 | 0.04    |
| <i>Anaerostipes</i>           | 0.93 | 0.86-1.00 | 0.04    |
| <i>Eggerthella</i>            | 1.05 | 1.00-1.09 | 0.05    |
| <i>Lactococcus</i>            | 0.95 | 0.89-1.00 | 0.07    |
| <i>Ezakiella</i>              | 1.09 | 0.98-1.22 | 0.1     |
| <i>Blautia</i>                | 1.1  | 0.98-1.25 | 0.11    |
| <i>Lactonifactor</i>          | 1.1  | 0.98-1.24 | 0.12    |
| <i>Negativicoccus</i>         | 1.07 | 0.98-1.17 | 0.12    |
| <i>Staphylococcus</i>         | 0.94 | 0.87-1.02 | 0.13    |
| <i>Anaerotignum</i>           | 1.03 | 0.99-1.08 | 0.14    |
| <i>Megasphaera</i>            | 1.04 | 0.98-1.10 | 0.16    |
| <i>Dakarella</i>              | 1.04 | 0.98-1.10 | 0.18    |
| <i>Ruminococcus</i>           | 0.97 | 0.92-1.02 | 0.19    |
| <i>Dialister</i>              | 1.03 | 0.99-1.07 | 0.21    |
| <i>Campylobacter</i>          | 0.96 | 0.89-1.03 | 0.22    |
| <i>Faecalicatena</i>          | 1.05 | 0.97-1.14 | 0.22    |
| <i>Congobacterium</i>         | 1.05 | 0.97-1.15 | 0.23    |
| <i>Methanomassiliococcus</i>  | 1.05 | 0.96-1.15 | 0.25    |
| <i>Fournierella</i>           | 1.05 | 0.96-1.15 | 0.26    |
| <i>Methanosphaera</i>         | 0.95 | 0.87-1.04 | 0.26    |
| <i>Mitsuokella</i>            | 0.95 | 0.88-1.04 | 0.27    |
| <i>Mobiluncus</i>             | 0.95 | 0.86-1.04 | 0.28    |
| <i>Peptostreptococcus</i>     | 0.96 | 0.90-1.03 | 0.28    |
| <i>Atopobium</i>              | 0.95 | 0.86-1.05 | 0.29    |
| <i>Massiliprevotella</i>      | 1.03 | 0.98-1.08 | 0.29    |
| <i>Alistipes</i>              | 0.97 | 0.91-1.03 | 0.33    |
| <i>Peptococcus</i>            | 1.05 | 0.95-1.16 | 0.33    |
| <i>Erysipelatoclostridium</i> | 1.03 | 0.97-1.08 | 0.34    |
| <i>Roseburia</i>              | 0.98 | 0.93-1.03 | 0.36    |
| <i>Absiella</i>               | 1.03 | 0.96-1.11 | 0.4     |
| <i>Enterococcus</i>           | 1.03 | 0.96-1.12 | 0.4     |
| <i>Fusobacterium</i>          | 1.03 | 0.96-1.12 | 0.4     |
| <i>Facklamia</i>              | 1.04 | 0.95-1.13 | 0.44    |
| <i>Bacteroides</i>            | 0.96 | 0.87-1.06 | 0.45    |

|                                  |                                       |          |           |       |
|----------------------------------|---------------------------------------|----------|-----------|-------|
|                                  | <i>Holdemanella</i>                   | 1.02     | 0.96-1.08 | 0.46  |
|                                  | <i>Gordonibacter</i>                  | 1.02     | 0.97-1.07 | 0.5   |
|                                  | <i>Megamonas</i>                      | 1.02     | 0.96-1.09 | 0.5   |
|                                  | <i>Sneathia</i>                       | 0.97     | 0.87-1.07 | 0.51  |
|                                  | <i>Others</i>                         | 0.98     | 0.93-1.04 | 0.53  |
|                                  | <i>Allisonella</i>                    | 0.98     | 0.92-1.04 | 0.55  |
|                                  | <i>Odoribacter</i>                    | 1.01     | 0.97-1.06 | 0.55  |
|                                  | <i>Dorea</i>                          | 1.02     | 0.96-1.09 | 0.56  |
|                                  | <i>Casaltella</i>                     | 0.98     | 0.90-1.06 | 0.57  |
|                                  | <i>Haemophilus</i>                    | 0.98     | 0.93-1.04 | 0.58  |
|                                  | <i>Faecalitalea</i>                   | 1.02     | 0.94-1.10 | 0.64  |
|                                  | <i>Holdemania</i>                     | 0.99     | 0.93-1.05 | 0.68  |
|                                  | <i>Libanicoccus</i>                   | 0.98     | 0.88-1.09 | 0.72  |
|                                  | <i>Actinomyces</i>                    | 0.99     | 0.92-1.06 | 0.73  |
|                                  | <i>Catenibacterium</i>                | 0.99     | 0.94-1.05 | 0.76  |
|                                  | <i>Varibaculum</i>                    | 1.01     | 0.94-1.09 | 0.76  |
|                                  | <i>Howardella</i>                     | 0.99     | 0.93-1.06 | 0.79  |
|                                  | <i>Prevotella</i>                     | 1.00     | 0.97-1.04 | 0.8   |
|                                  | <i>Barnesiella</i>                    | 1.00     | 0.94-1.05 | 0.86  |
|                                  | <i>Porphyromonas</i>                  | 0.99     | 0.92-1.08 | 0.89  |
|                                  | <i>Anaerococcus</i>                   | 1.00     | 0.93-1.08 | 0.96  |
|                                  | <i>Intestinimonas</i>                 | 1.00     | 0.94-1.07 | 0.96  |
|                                  | <i>Peptoniphilus</i>                  | 1.00     | 0.92-1.09 | 0.97  |
|                                  | <i>Oxalobacter</i>                    | 1.00     | 0.94-1.07 | 0.99  |
|                                  | <i>Oscillibacter</i>                  | 1.10     | 1.03-1.16 | <0.01 |
|                                  | <i>Parabacteroides</i>                | 1.09     | 1.03-1.16 | <0.01 |
|                                  | <i>Streptococcus</i>                  | 1.12     | 1.06-1.18 | <0.01 |
| Sex                              | Male                                  | 1.09     | 0.76-1.58 | 0.64  |
|                                  | Female                                | Referent | -         | -     |
| Age (years)                      | >34 to 42                             | 1.06     | 0.79-1.41 | 0.72  |
|                                  | >42 to 52                             | 1.02     | 0.76-1.38 | 0.88  |
|                                  | >52 to 81                             | 1.35     | 0.99-1.83 | 0.05  |
|                                  | 18 to 34                              | Referent | -         | -     |
| Age-sex interaction              | Male:Age(>34 to 42)                   | 0.7      | 0.42-1.17 | 0.17  |
|                                  | Male:Age(>42 to 52)                   | 0.61     | 0.35-1.04 | 0.07  |
|                                  | Male:Age(>52 to 81)                   | 0.54     | 0.31-0.93 | 0.03  |
| Race                             | African American                      | 1.33     | 0.57-3.08 | 0.51  |
|                                  | Asian/Oceania/Pacific Islander/Hawaii | 0.52     | 0.32-0.85 | 0.01  |
|                                  | Latin American/Hispanic               | 0.54     | 0.31-0.93 | 0.03  |
|                                  | Mixed                                 | 0.45     | 0.26-0.78 | <0.01 |
|                                  | Unknown                               | 0.87     | 0.72-1.05 | 0.16  |
|                                  | Caucasian/European/American           | Referent | -         | -     |
| Antibiotic use in preceding year | Penicillins                           | 1.24     | 0.98-1.58 | 0.07  |
|                                  | Tetracyclines                         | 1.73     | 1.17-2.56 | 0.01  |
|                                  | Cephalosporins                        | 1.88     | 1.11-3.17 | 0.02  |
|                                  | Quinolones                            | 2.06     | 1.37-3.10 | <0.01 |
|                                  | Lincomycins                           | 2.24     | 0.98-5.14 | 0.06  |
|                                  | Macrolides                            | 1.46     | 1.04-2.05 | 0.03  |
|                                  | Sulfonamides                          | 1.62     | 0.79-3.32 | 0.19  |

|                                       |                          |      |            |       |
|---------------------------------------|--------------------------|------|------------|-------|
|                                       | Glycopeptides            | 4.81 | 0.58-39.96 | 0.15  |
|                                       | Aminoglycosides          | 1.09 | 0.17-6.87  | 0.92  |
| Family history<br>of gut<br>disorders | Irritable bowel syndrome | 5.15 | 3.80-6.98  | <0.01 |
|                                       | Ulcerative colitis       | 0.96 | 0.54-1.68  | 0.88  |
|                                       | Crohn's disease          | 1.25 | 0.91-1.71  | 0.18  |
|                                       | Diverticulitis           | 0.96 | 0.56-1.67  | 0.89  |

Table A5: Wilcoxon rank-sum tests of all phyla for control vs. IBS (Full model)

| Phyla           | W      | Adjusted p-value (q-value) |
|-----------------|--------|----------------------------|
| Verrucomicrobia | 967675 | 0.46                       |
| Lentisphaerae   | 872461 | <0.01                      |
| Firmicutes      | 912685 | 0.11                       |
| Bacteroidetes   | 832432 | <0.01                      |
| Actinobacteria  | 928450 | 0.34                       |
| Proteobacteria  | 967385 | 0.46                       |
| Euryarchaeota   | 976484 | 0.34                       |
| Fusobacteria    | 840477 | <0.01                      |
| Synergistetes   | 844810 | <0.01                      |
| Others          | 862726 | <0.01                      |





Table A6: Logistic regression for control vs. IBS at phylum level (Full model)

|                                  | Variable                              | OR        | CI         | p.value |
|----------------------------------|---------------------------------------|-----------|------------|---------|
| Phyla                            | <i>Lentisphaerae</i>                  | 1.02      | 0.95-1.10  | 0.50    |
|                                  | <i>Firmicutes</i>                     | 0.99      | 0.86-1.14  | 0.87    |
|                                  | <i>Bacteroidetes</i>                  | 1.15      | 1.03-1.28  | 0.01    |
|                                  | <i>Fusobacteria</i>                   | 1.09      | 1.03-1.15  | <0.01   |
|                                  | <i>Synergistetes</i>                  | 1.11      | 1.05-1.18  | <0.01   |
|                                  | Others                                | 1.05      | 0.95-1.15  | 0.35    |
| Sex                              | Male                                  | 0.84      | 0.60-1.18  | 0.32    |
|                                  | Female                                | Referent  | -          | -       |
| Age                              | >34 to 42                             | 1.12      | 0.85-1.47  | 0.44    |
|                                  | >42 to 52                             | 1.13      | 0.86-1.49  | 0.38    |
|                                  | >52 to 81                             | 1.53      | 1.16-2.02  | <0.01   |
|                                  | 18 to 34                              | Referent  | -          | -       |
| Age-sex interaction              | Male:Age(>34 to 42)                   | 0.81      | 0.50-1.31  | 0.39    |
|                                  | Male:Age(>42 to 52)                   | 0.65      | 0.39-1.08  | 0.1     |
|                                  | Male:Age(>52 to 81)                   | 0.65      | 0.39-1.08  | 0.1     |
| Race                             | African American                      | 1.41      | 0.64-3.10  | 0.39    |
|                                  | Asian/Oceania/Pacific Islander/Hawaii | 0.49      | 0.31-0.79  | <0.01   |
|                                  | Latin American/Hispanic               | 0.6       | 0.36-1.00  | 0.05    |
|                                  | Mixed                                 | 0.5       | 0.29-0.87  | 0.01    |
|                                  | Unknown                               | 0.87      | 0.72-1.03  | 0.11    |
|                                  | Caucasian/European/American           | Referent  | -          | -       |
| Antibiotic use in preceding year | Penicillins                           | 1.43      | 1.15-1.79  | <0.01   |
|                                  | Tetracyclines                         | 1.92      | 1.32-2.78  | <0.01   |
|                                  | Cephalosporins                        | 1.97      | 1.20-3.25  | 0.01    |
|                                  | Quinolones                            | 2.46      | 1.68-3.62  | <0.01   |
|                                  | Lincomycins                           | 2.53      | 1.15-5.58  | 0.02    |
|                                  | Macrolides                            | 1.62      | 1.17-2.24  | <0.01   |
|                                  | Sulfonamides                          | 1.95      | 0.98-3.89  | 0.06    |
|                                  | Glycopeptides                         | 6.32      | 0.77-51.88 | 0.09    |
| Aminoglycosides                  | 1.1                                   | 0.18-6.56 | 0.92       |         |
| Family history of gut disorders  | Irritable bowel syndrome              | 5.47      | 4.09-7.32  | <0.01   |
|                                  | Ulcerative colitis                    | 0.96      | 0.57-1.64  | 0.89    |
|                                  | Crohn's disease                       | 1.02      | 0.61-1.71  | 0.93    |
|                                  | Diverticulitis                        | 1.3       | 0.96-1.75  | 0.09    |

Table A7: Participant characteristics and distribution in control and IBS groups in the subgroup on antibiotics (n=1010)

|                                                   | Control (n = 270) |                | IBS (n = 740) |                | p-value         |
|---------------------------------------------------|-------------------|----------------|---------------|----------------|-----------------|
| <b>Age</b> [n, median (25th-75th percentile)]     | 270               | 41(34-50)      | 740           | 42(34-53)      | 0.14            |
| <b>Gender</b> [n, (%)]                            |                   |                |               |                |                 |
| Female                                            | 183               | (67.78)        | 561           | (75.81)        | 0.01            |
| Male                                              | 87                | (32.22)        | 179           | (24.19)        | 0.01            |
| <b>Region of the U.S.</b> [n, (%)]                |                   |                |               |                |                 |
| Midwest                                           | 49                | (18.22)        | 131           | (17.70)        | 0.91            |
| Northeast                                         | 49                | (18.22)        | 143           | (19.32)        | 0.68            |
| South                                             | 77                | (28.62)        | 226           | (30.54)        | 0.51            |
| West                                              | 94                | (34.94)        | 240           | (32.43)        | 0.44            |
| <b>Race</b> [n, (%)]                              |                   |                |               |                |                 |
| Caucasian/European/American                       | 144               | (53.33)        | 452           | (61.08)        | 0.01            |
| African American                                  | 1                 | (0.37)         | 9             | (1.22)         | 0.32            |
| Asian/Oceanian/Pacific Islander/Hawaiian          | 11                | (4.10)         | 13            | (1.80)         | <0.01           |
| Latin American/Hispanic                           | 8                 | (2.96)         | 18            | (2.43)         | 0.71            |
| Mixed                                             | 11                | (4.10)         | 14            | (1.89)         | 0.02            |
| Unknown                                           | 95                | (35.19)        | 234           | (31.62)        | 0.23            |
| <b>Antibiotics in the preceding year</b> [n, (%)] | <b>349</b>        |                | <b>1,283</b>  |                |                 |
| Penicillins                                       | 160               | (45.85)        | 416           | (32.42)        | <0.01           |
| Tetracyclines                                     | 45                | (12.89)        | 184           | (14.34)        | 0.54            |
| Cephalosporins                                    | 23                | (6.59)         | 110           | (8.57)         | 0.27            |
| Quinolones                                        | 37                | (10.60)        | 211           | (16.45)        | <0.01           |
| Lincomycins                                       | 8                 | (2.29)         | 59            | (4.60)         | 0.07            |
| Macrolides                                        | 62                | (17.77)        | 211           | (16.45)        | 0.61            |
| Sulfonamides                                      | 11                | (3.15)         | 67            | (5.22)         | 0.14            |
| Glycopeptides                                     | 1                 | (0.29)         | 19            | (1.48)         | <0.01           |
| Aminoglycosides                                   | 2                 | (0.57)         | 6             | (0.47)         | 0.28            |
| <b>Family history of gut disorders</b> [n, (%)]   | <b>49</b>         | <b>(17.17)</b> | <b>377</b>    | <b>(44.92)</b> | <b>&lt;0.01</b> |
| IBS                                               | 21                | (10.88)        | 203           | (26.72)        | 0.16            |
| Ulcerative colitis                                | 7                 | (3.63)         | 27            | (3.55)         | 0.09            |
| Crohn's disease                                   | 4                 | (2.07)         | 33            | (4.34)         | 0.99            |
| Diverticulitis                                    | 17                | (8.81)         | 114           | (15.00)        | 0.60            |

Figure A3: Species-level pairwise odds ratios for IBS vs. control in the subgroup on antibiotics

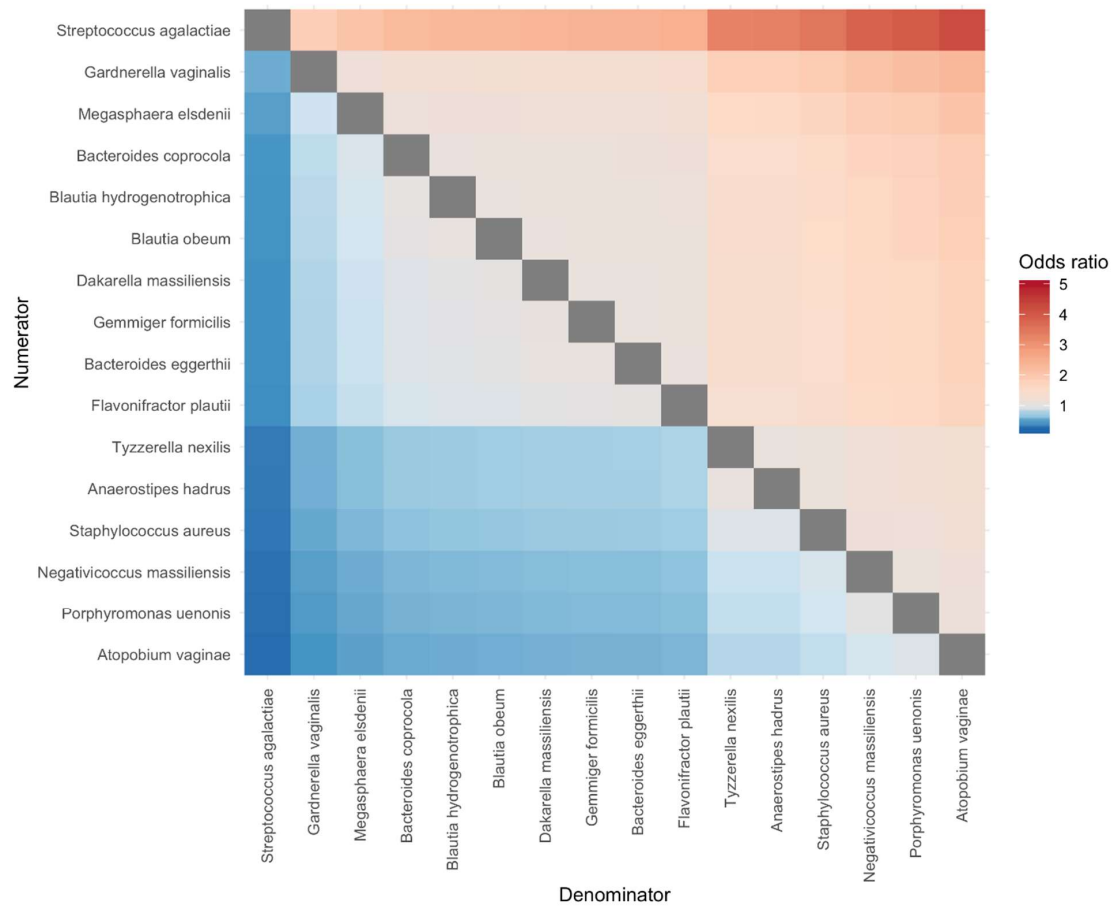

Figure A4: Genus-level pairwise odds ratios for IBS vs. control in the subgroup on antibiotics

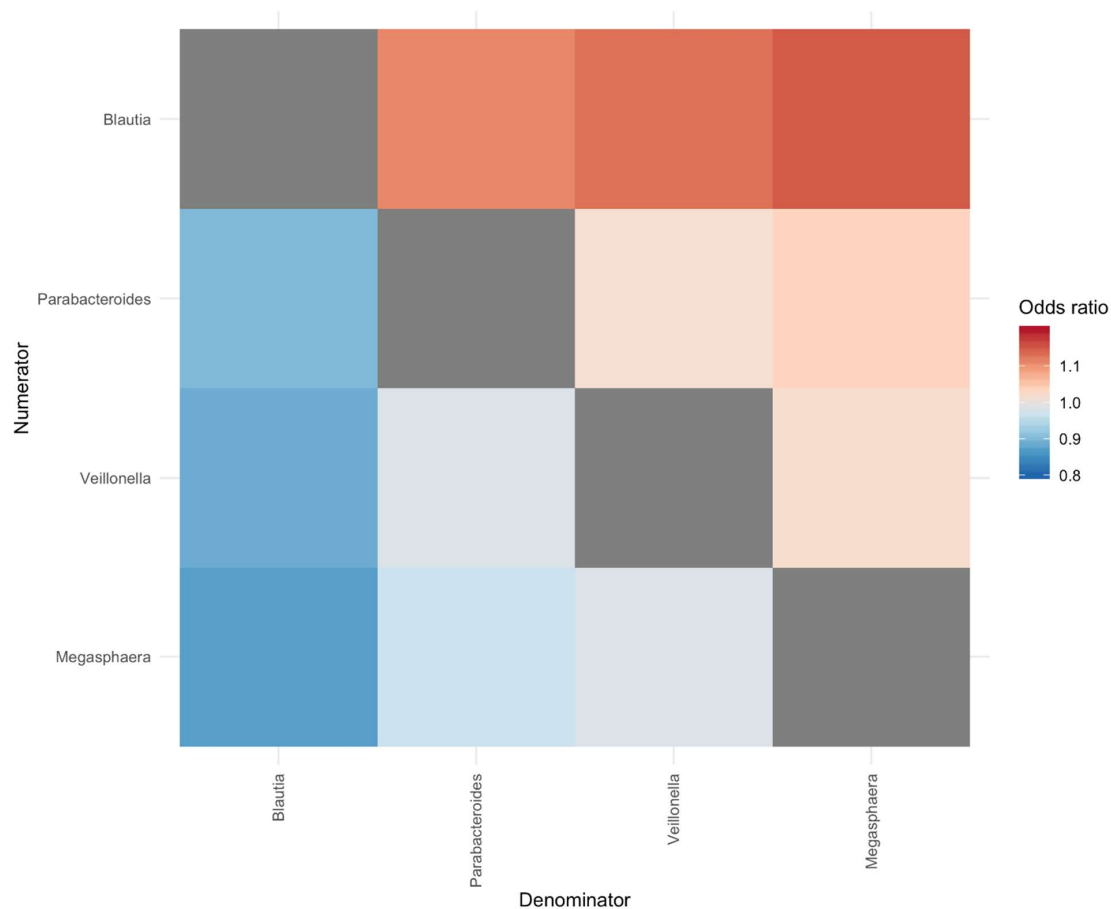

Supplement: bmjgast-2019-000345supp001.pdf [file bmjgast-2019-000345supp001.pdf]
